# Supplementary material for: Evaluating the Consistency of Subjective Activity Assessments and Their Relation to Cognition in Older Adults
Source: MDPI journal article supplement (doi:10.3390/geriatrics6030074), 2021-07-28
Supplement: s1 [file s1]

**Table S1.** Correlations Between Daily and Weekly Activity Domain Assessment Scores.

|                  | <b>Cognitive Daily</b> | <b>Social Daily</b> | <b>Physical Daily</b> | <b>Cognitive Weekly</b> | <b>Social Weekly</b> | <b>Physical Weekly</b> |
|------------------|------------------------|---------------------|-----------------------|-------------------------|----------------------|------------------------|
| Cognitive Daily  | 1                      | 0.26**              | 0.18*                 | 0.26**                  | -0.02                | 0.00                   |
| Social Daily     | 0.26**                 | 1                   | -0.20**               | 0.04                    | 0.21**               | 0.10                   |
| Physical Daily   | 0.18*                  | 0.20**              | 1                     | -0.04                   | 0.07                 | 0.39**                 |
| Cognitive Weekly | 0.26**                 | 0.04                | -0.04                 | 1                       | 0.45**               | 0.26**                 |
| Social Weekly    | -0.02                  | 0.21**              | 0.07                  | 0.45**                  | 1                    | 0.38**                 |
| Physical Weekly  | 0.00                   | 0.10                | 0.39**                | 0.26**                  | 0.38**               | 1                      |

\* Correlation significant at the 0.01 level (2-tailed). \*\* Correlation significant at the 0.05 level (2-tailed).

**Table S2.** Correlations Between Total Activity & Domain Differences, and Cognitive Factors.

|                             | <b>Total Activity Difference</b> | <b>Cognitive Activity Difference</b> | <b>Social Activity Difference</b> | <b>Physical Activity Difference</b> | <b>Fluid Factor</b> | <b>Verbal Factor</b> | <b>Memory Factor</b> |
|-----------------------------|----------------------------------|--------------------------------------|-----------------------------------|-------------------------------------|---------------------|----------------------|----------------------|
| Total Activity Difference   | 1                                | 0.75**                               | 0.81**                            | 0.68**                              | -0.02               | 0.05                 | -0.03                |
| Cognitive Domain Difference | 0.75**                           | 1                                    | 0.44**                            | 0.34**                              | 0.05                | 0.03                 | 0.06                 |
| Social Domain Difference    | 0.81**                           | 0.44**                               | 1                                 | 0.28**                              | 0.04                | 0.06                 | -0.09                |
| Physical Domain Difference  | 0.68**                           | 0.34**                               | 0.28**                            | 1                                   | -0.14               | 0.02                 | -0.00                |
| Fluid Factor                | -0.02                            | 0.05                                 | 0.04                              | -0.14                               | 1                   | 0.33**               | 0.31**               |
| Verbal Factor               | 0.05                             | 0.03                                 | 0.06                              | 0.02                                | 0.33**              | 1                    | 0.33**               |
| Memory Factor               | -0.03                            | 0.06                                 | -0.09                             | -0.00                               | 0.31**              | 0.33**               | 1                    |

\* Correlation significant at the 0.01 level (2-tailed). \*\* Correlation significant at the 0.05 level (2-tailed).
